# Supplementary material for: Zoonotic Vectorborne Pathogens and Ectoparasites of Dogs and Cats in Eastern and Southeast Asia
Source: PubMed Central journal article supplement (PMC7258489; doi:10.3201/eid2606.191832), 2020-06
Supplement: 19-1832-Techapp-s1.pdf [file 19-1832-Techapp-s1.pdf]

# Ectoparasites and Vectorborne Zoonotic Pathogens of Dogs and Cats in Eastern and Southeast Asia, 2017–2018

## Appendix

**Appendix Table.** Target genes, primers (sequence and length) and cPCR/qPCR cycling conditions used in this study to detect and characterize parasites from dogs and cats

| Species/Pathogen                          | Target gene     | Primers                     | Sequence (5'-3')                                                        | Fragment length (bp) | Reference                                                                                                                                                                        |
|-------------------------------------------|-----------------|-----------------------------|-------------------------------------------------------------------------|----------------------|----------------------------------------------------------------------------------------------------------------------------------------------------------------------------------|
| Nematodes                                 | <i>cox1</i>     | NTF<br>NTR                  | TGATTGGTGGTTTTGGTAA<br>ATAAGTACGAGTATCAATATC                            | 648                  | (1)                                                                                                                                                                              |
| Ticks                                     | 16S rRNA        | RHS16SF<br>RHS16SR          | CTGCTCAATGATTTTTTAAATTGCTGT<br>TTACGCTGTTATCCCTAGAG                     | 300                  | (2)<br>Modified as follows: 94°C for 10 min initial denaturation, followed by 35 cycles at 94°C for 45s, 58°C for 45s, 72°C for 60s and 72°C for 7 min for the final elongation. |
| Fleas, lice, mites                        | <i>cox1</i>     | LCO1490<br>HCO02198         | GGTCAACAAATCATAAAGATATTGG<br>TAAACTTCAGGGTGACCAAAAAATCA                 | 710                  | (3)<br>Modified as follows: 95°C for 10 min followed by 35 cycles at 95°C for 60 s, 44°C for 60 s, 72°C for 90 s, and 7 min at 72°C for final elongation.                        |
| Fleas                                     | <i>cox1</i>     | LCO1490<br>Cff-R            | GGTCAACAAATCATAAAGATATTGG<br>GAAGGGTCAAAGAATGATGT                       | 601                  | (4)<br>Modified as follows: denaturing at 95°C for 10 min followed by 35 cycles at 95°C for 30 s, 52°C for 30 s, 72°C for 45 s, and 7 min at 72°C for final elongation.          |
| <i>Notoedres/</i><br><i>Lynxacarus</i>    | 18S rRNA        | Mite18S-F<br>Mite18S-R      | ATATTGGAGGGCAAGTCTGG<br>TGGCATCGTTTATGGTTAG                             | 464–490              | (5)                                                                                                                                                                              |
| <i>Babesia/</i><br><i>Hepatozoon</i> spp. | 18S rRNA        | RLB-F<br>RLB-R              | GAGGTAGTGACAAGAAATAACAATA<br>TCTTCGATCCCCTAACTTTC                       | 460                  | (6)<br>Modified as follows: 95°C for 10 min initial denaturation, followed by 40 cycles at 95°C for 30s, 52°C for 30s, 72°C for 60s and 72°C for 7 min for the final elongation. |
| <i>Leishmania</i> spp.                    | ITS-2           | LGITSF2<br>LGITSR2          | GCATGCCATATTCTCAGTGTG<br>GGCCAACGCGAAGTTGAATTC                          | 383–450              | (7)<br>Modified as follows: 95°C for 10 min initial denaturation, followed by 35 cycles at 95°C for 30s, 60°C for 30s, 72°C for 60s and 72°C for 7 min for the final elongation. |
| <i>Leishmania</i> spp.                    | kDNA minicircle | MC-1<br>MC-2                | GTTAGCCGATGGTGGTCTTG<br>CACCCATTTTTCCGATTTTG                            | 447                  | (8)                                                                                                                                                                              |
| <i>Leishmania</i> spp.                    | kDNA minicircle | LEISH-1<br>LEISH-2<br>Probe | AACTTTTCTGGTCCCTCCGGGTAG<br>ACCCCCAGTTTCCCGCC<br>FAM-AAAAATGGGTGCAGAAAT | 120                  | (9)                                                                                                                                                                              |

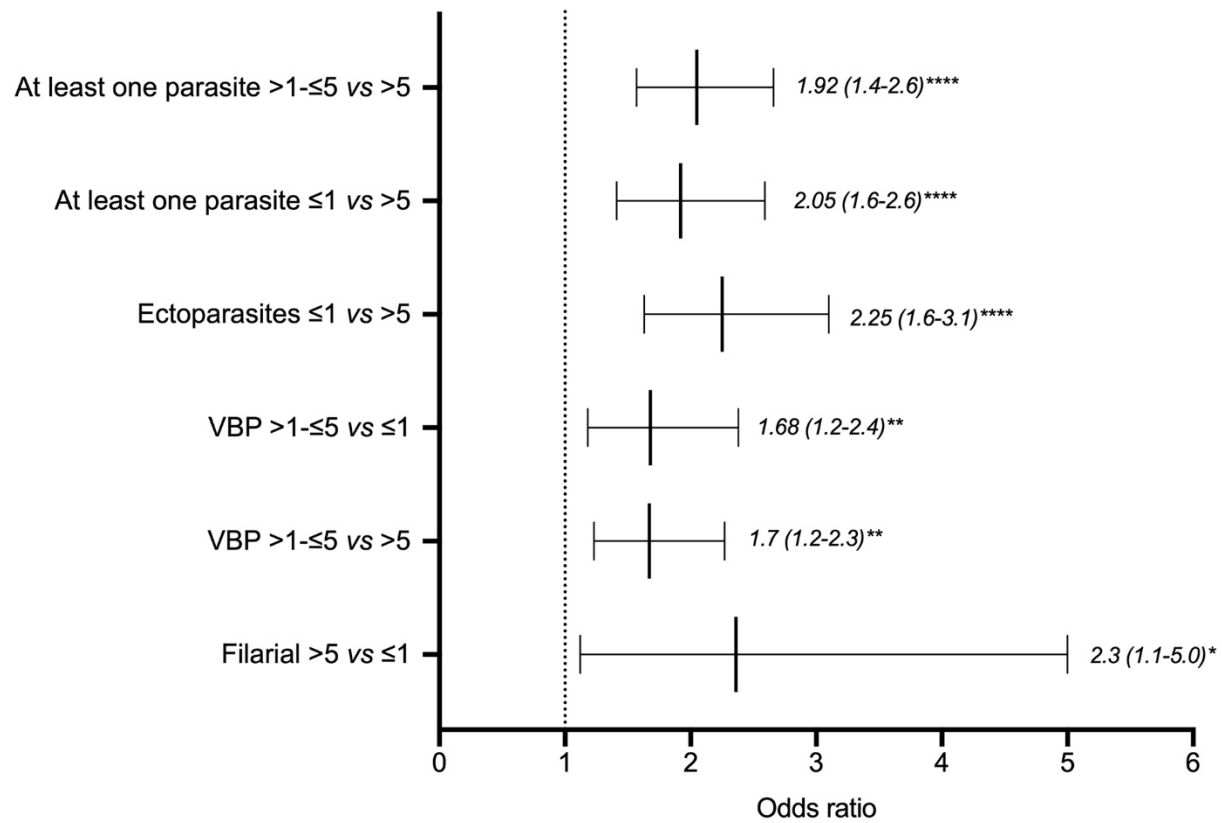

**Appendix Figure 1.** Box plot of odds ratio (median and range) of the detection/exposure to at least one vector-borne pathogen or ectoparasite, ectoparasites- or vector-borne pathogens-only, and to filarial parasites in dogs aging ≤1, >1-≤5 and >5 years. Odds ratio and CI 95% in brackets. \*\*\*\* p < 0.0001, \*\* p < 0.001, \* p < 0.01, ns not significant.

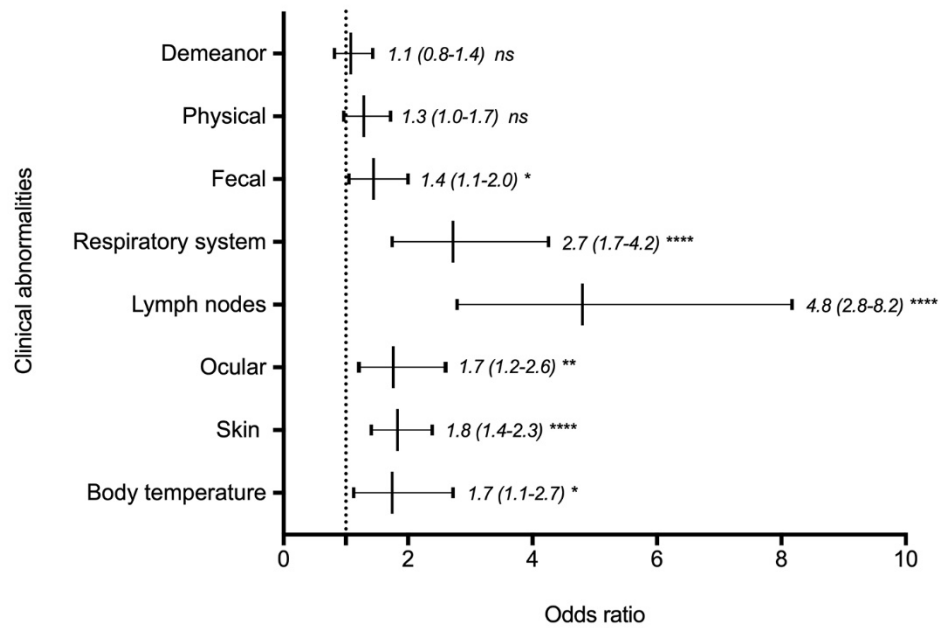

**Appendix Figure 2.** Box plot of odds ratio (median and range) of selected clinical abnormalities associated with overall detection/exposure to at least one parasite in dogs. Odds ratio and CI 95% in brackets. \*\*\*\*  $p < 0.0001$ , \*\*  $p < 0.001$ , \*  $p < 0.01$ , ns not significant.

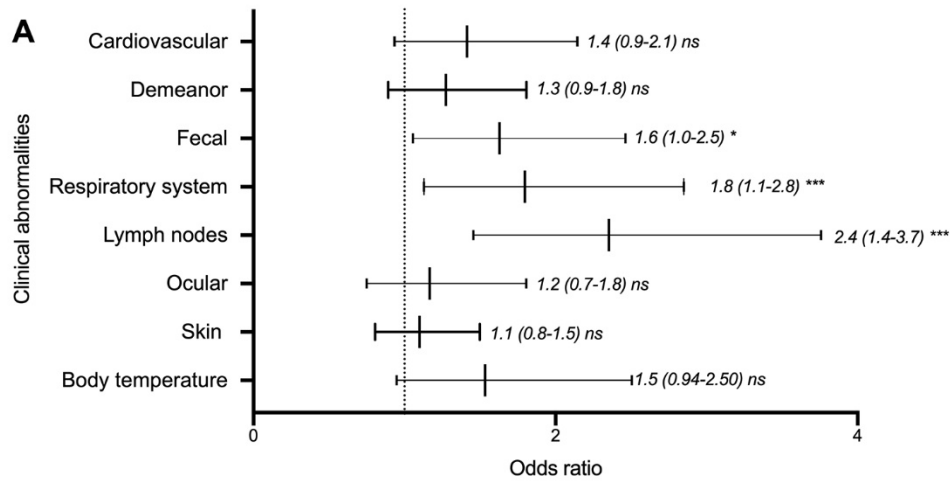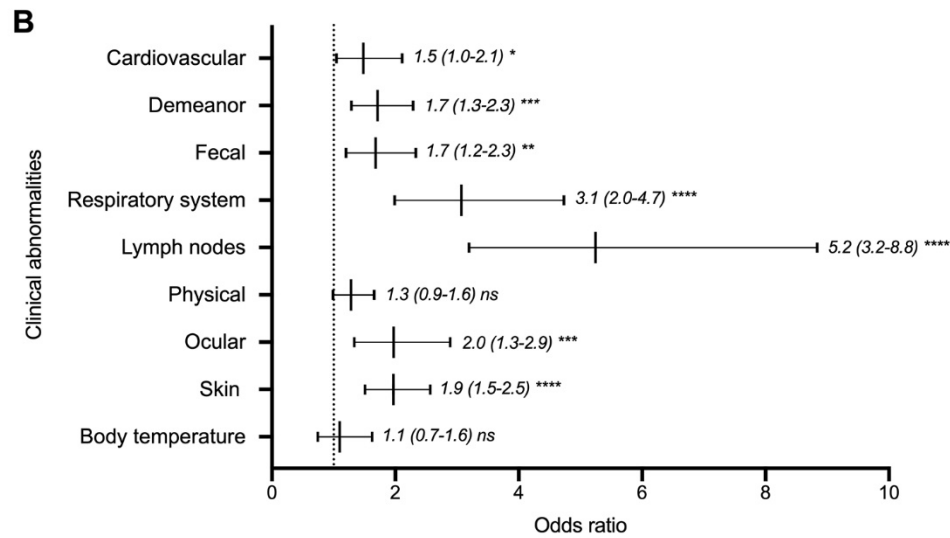

**Appendix Figure 3.** Box plot of odds ratio (median and range) of selected clinical abnormalities associated with the detection/exposure to VBPs (**A**) or ectoparasitic infestation in dogs (**B**). Odds ratio and CI 95% in brackets. \*\*\*\* p < 0.0001, \*\*\* p < 0.001, \*\* p < 0.002, \* p < 0.01, ns not significant.

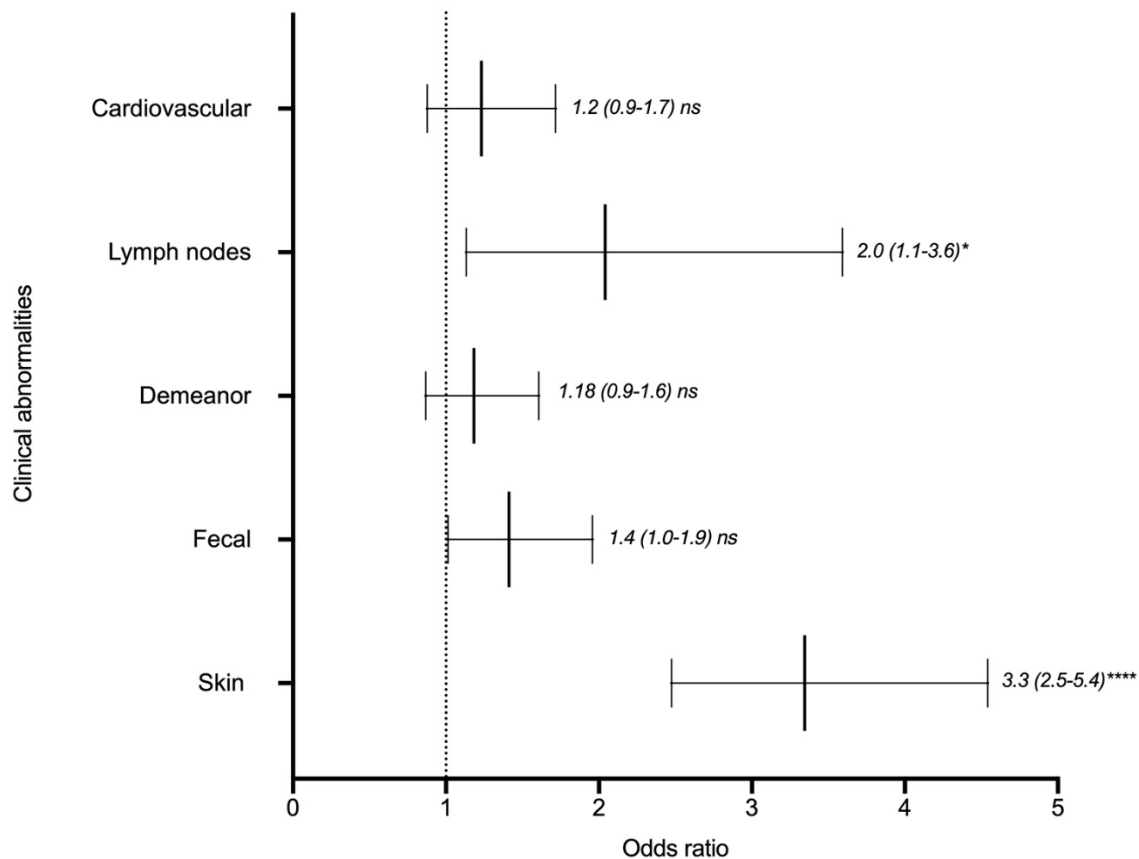

**Appendix Figure 4.** Box plot of odds ratio (median and range) of selected clinical abnormalities associated with the detection of ectoparasitic infestation in cats. Odds ratio and CI 95% in brackets. \*\*\*\* p < 0.0001, \* p < 0.01, ns not significant.

## References

1. Casiraghi M, Anderson TJ, Bandi C, Bazzocchi C, Genchi C. A phylogenetic analysis of filarial nematodes: comparison with the phylogeny of *Wolbachia* endosymbionts. *Parasitology*. 2001;122:93–103. [PubMed https://doi.org/10.1017/S0031182000007149](https://doi.org/10.1017/S0031182000007149)
2. Burlini L, Teixeira KRS, Szabó MPJ, Famadas KM. Molecular dissimilarities of *Rhipicephalus sanguineus* (Acari: Ixodidae) in Brazil and its relation with samples throughout the world: is there a geographical pattern? *Exp Appl Acarol*. 2010;50:361–74. [PubMed https://doi.org/10.1007/s10493-009-9321-8](https://doi.org/10.1007/s10493-009-9321-8)
3. Folmer O, Black M, Hoeh W, Lutz R, Vrijenhoek R. DNA primers for amplification of mitochondrial cytochrome c oxidase subunit I from diverse metazoan invertebrates. *Mol Mar Biol Biotechnol*. 1994;3:294–9. [PubMed](https://pubmed.ncbi.nlm.nih.gov/10522222/)

4. Lawrence AL, Brown GK, Peters B, Spielman DS, Morin-Adeline V, Šlapeta J. High phylogenetic diversity of the cat flea (*Ctenocephalides felis*) at two mitochondrial DNA markers. *Med Vet Entomol.* 2014;28:330–6. [PubMed https://doi.org/10.1111/mve.12051](https://doi.org/10.1111/mve.12051)
5. Sourassou NF, De Moraes GJ, Júnior ID, Corrêa AS. Phylogenetic analysis of *Ascidae* sensu lato and related groups (Acari: Mesostigmata: Gamasina) based on nuclear ribosomal DNA partial sequences. *Syst Appl Acarol.* 2015;20:225–40. <https://doi.org/10.11158/saa.20.3.1>
6. Gubbels JM, de Vos AP, van der Weide M, Viseras J, Schouls LM, de Vries E, et al. Simultaneous detection of bovine *Theileria* and *Babesia* species by reverse line blot hybridization. *J Clin Microbiol.* 1999;37:1782–9. [PubMed https://doi.org/10.1128/JCM.37.6.1782-1789.1999](https://doi.org/10.1128/JCM.37.6.1782-1789.1999)
7. de Almeida ME, Steurer FJ, Koru O, Herwaldt BL, Pieniazek NJ, da Silva AJ. Identification of *Leishmania* spp. by molecular amplification and DNA sequencing analysis of a fragment of rRNA internal transcribed spacer 2. *J Clin Microbiol.* 2011;49:3143–9. [PubMed https://doi.org/10.1128/JCM.01177-11](https://doi.org/10.1128/JCM.01177-11)
8. Cortes S, Rolão N, Ramada J, Campino L. PCR as a rapid and sensitive tool in the diagnosis of human and canine leishmaniasis using *Leishmania donovani* s.l.-specific kinetoplastid primers. *Trans R Soc Trop Med Hyg.* 2004;98:12–7. [PubMed https://doi.org/10.1016/S0035-9203\(03\)00002-6](https://doi.org/10.1016/S0035-9203(03)00002-6)
9. Francino O, Altet L, Sánchez-Robert E, Rodriguez A, Solano-Gallego L, Alberola J, et al. Advantages of real-time PCR assay for diagnosis and monitoring of canine leishmaniosis. *Vet Parasitol.* 2006;137:214–21. [PubMed https://doi.org/10.1016/j.vetpar.2006.01.011](https://doi.org/10.1016/j.vetpar.2006.01.011)
